# Supplementary material for: Mind the gap: Improving discharge communication between secondary and primary care
Source: PubMed Central journal article supplement — BMJ Qual Improv Rep. 2015 Sep 2;4(1):u207936.w3197. doi: 10.1136/bmjquality.u207936.w3197 (PMC4693041; doi:10.1136/bmjquality.u207936.w3197), 2015-09-02
Supplement: bmjqir-4-u207936-w3197-s1.pdf [file bmjqir-4-u207936-w3197-s1.pdf]

# THE GOLDEN RULES OF GOOD DISCHARGE

Ensure the basics are covered:  
Timely, state diagnosis and  
team, give a copy to the patient.

Avoid asking  
“GP please chase...”.  
requesting physician  
should follow up

Make clear which  
drugs have been  
stopped, started  
or changed

Clarify any hospital follow-  
up arranged: What,  
when, with whom?

Consider  
phoning the  
GP directly

Include significant  
investigations and  
results e.g. MMSE,  
blood tests, scans.

Issue ‘Fit Notes’ from  
hospital and record  
this on the discharge  
summary

Share responsibility  
for follow up with  
the patient

# FIGURE 2

Discharge summaries with grade of completing clinician recorded

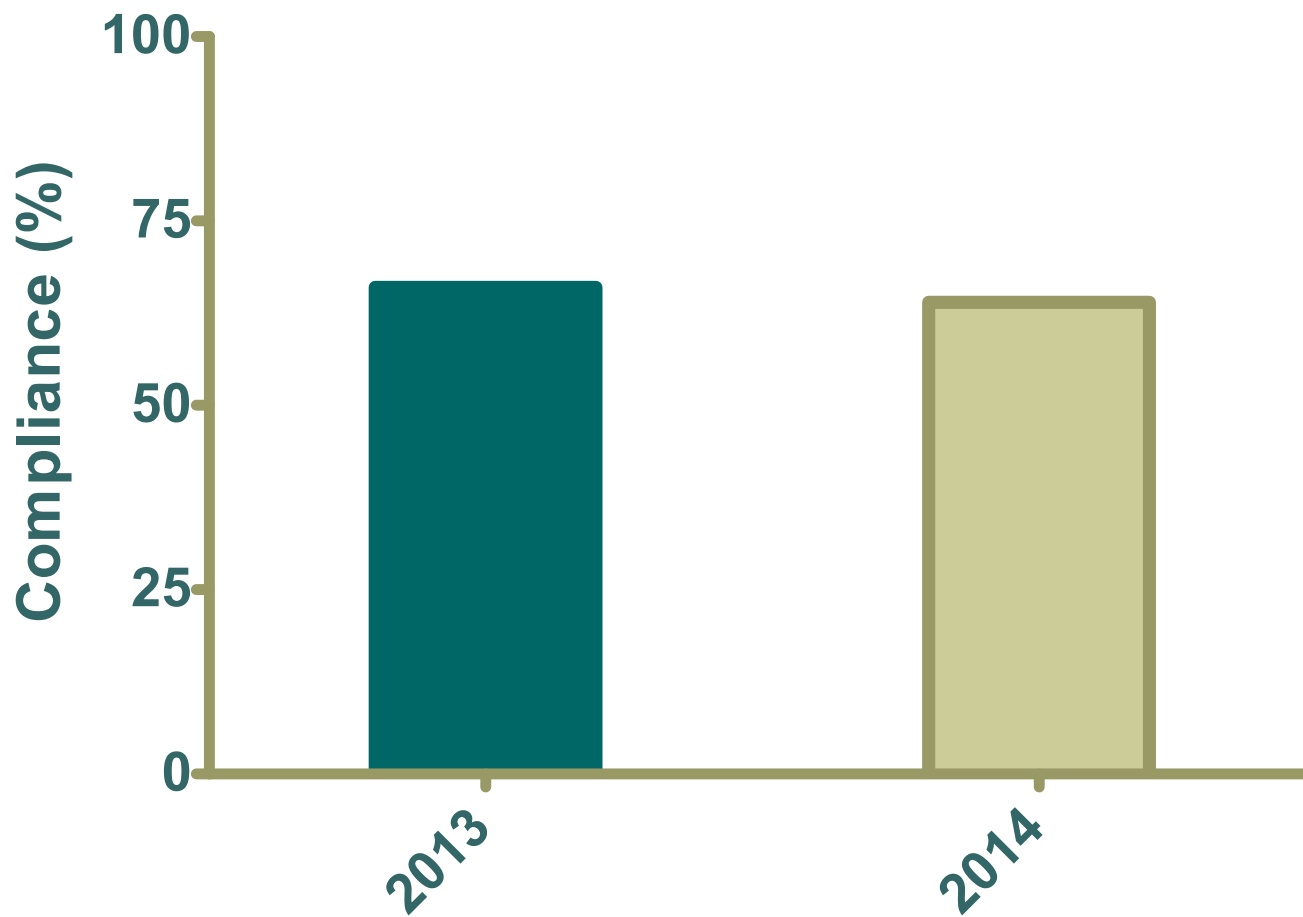

# FIGURE 3

Discharge summaries with a clear deadline for tasks requested in primary care

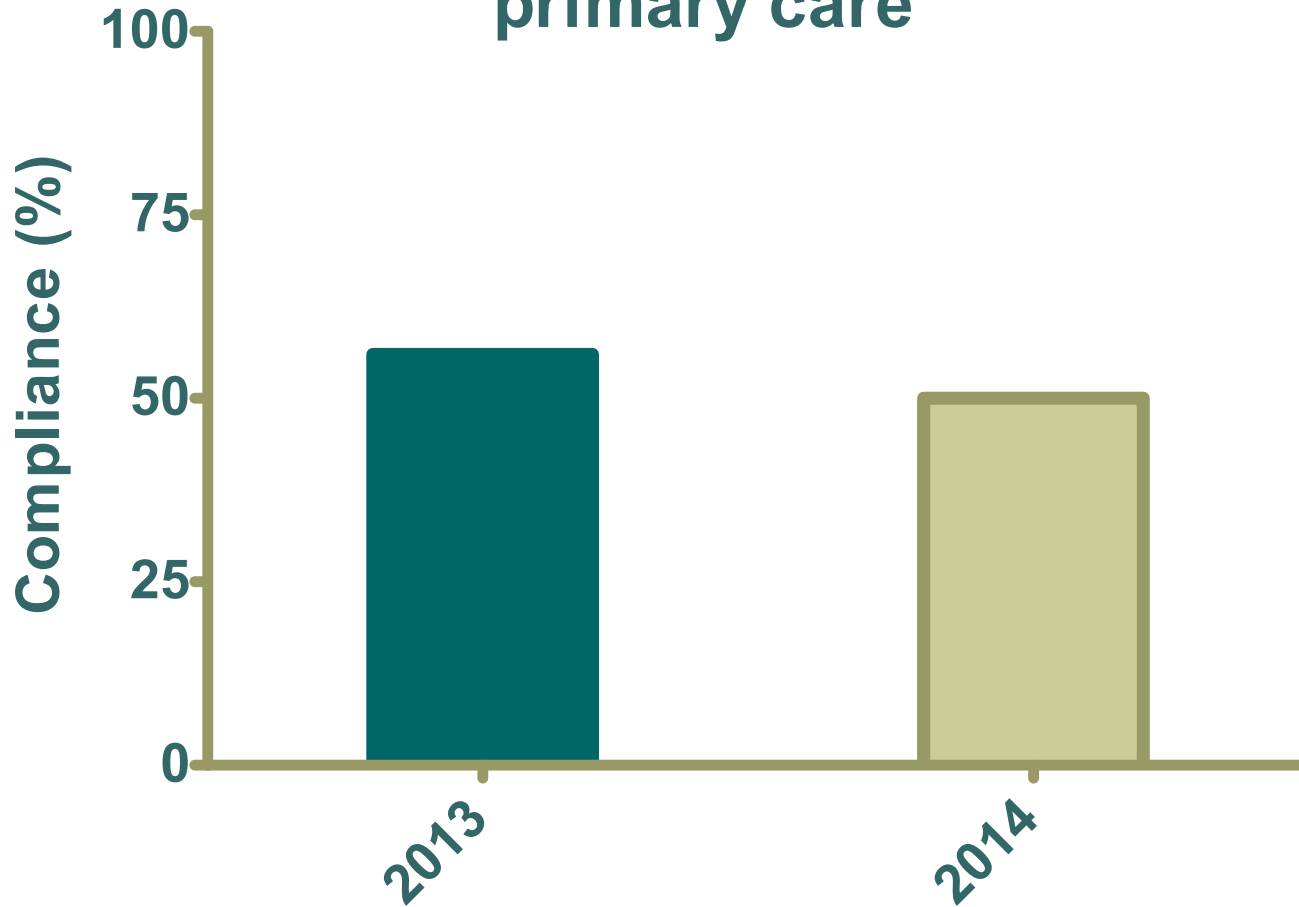

# FIGURE 4

Tasks requested on discharge summary completed in primary care

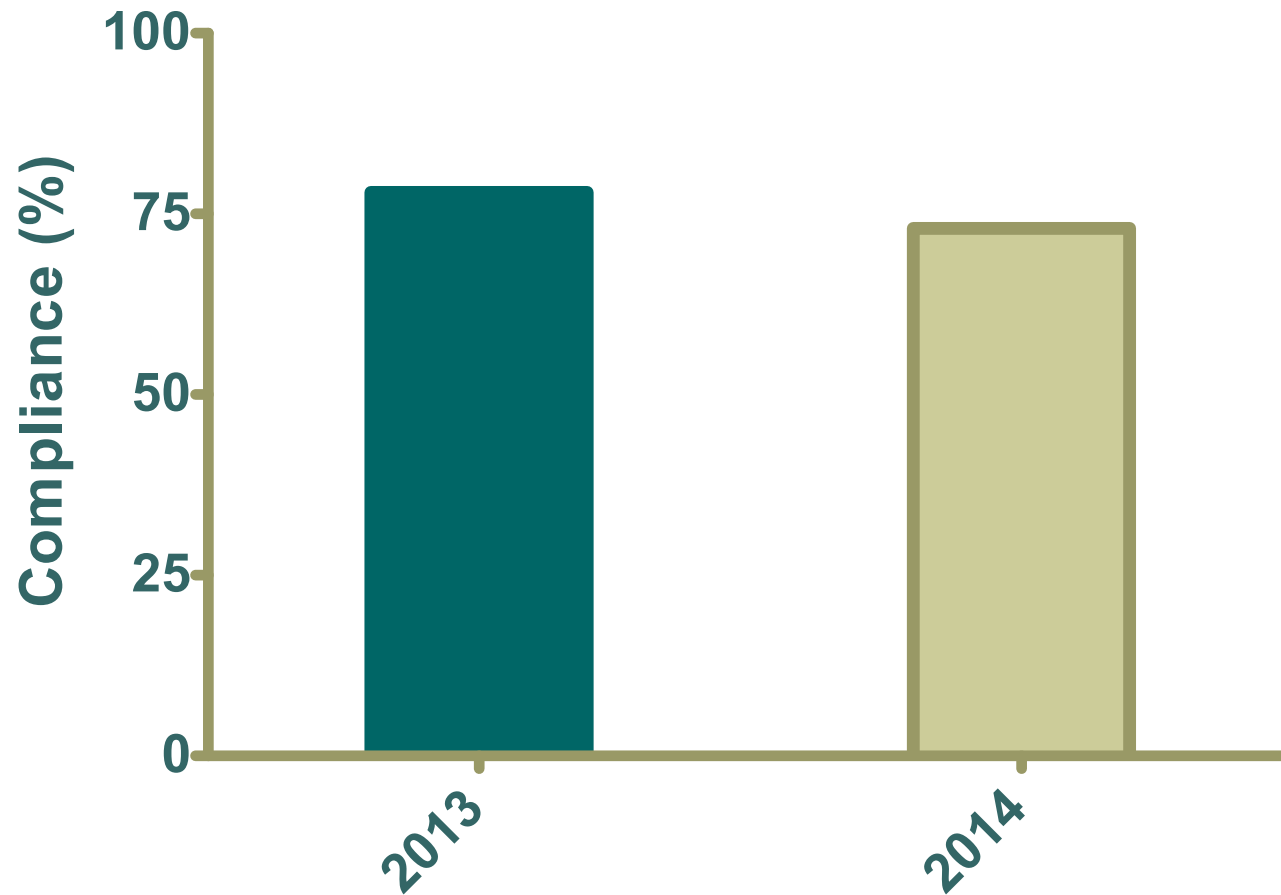

# Time between completion of discharge summary and receipt in primary care

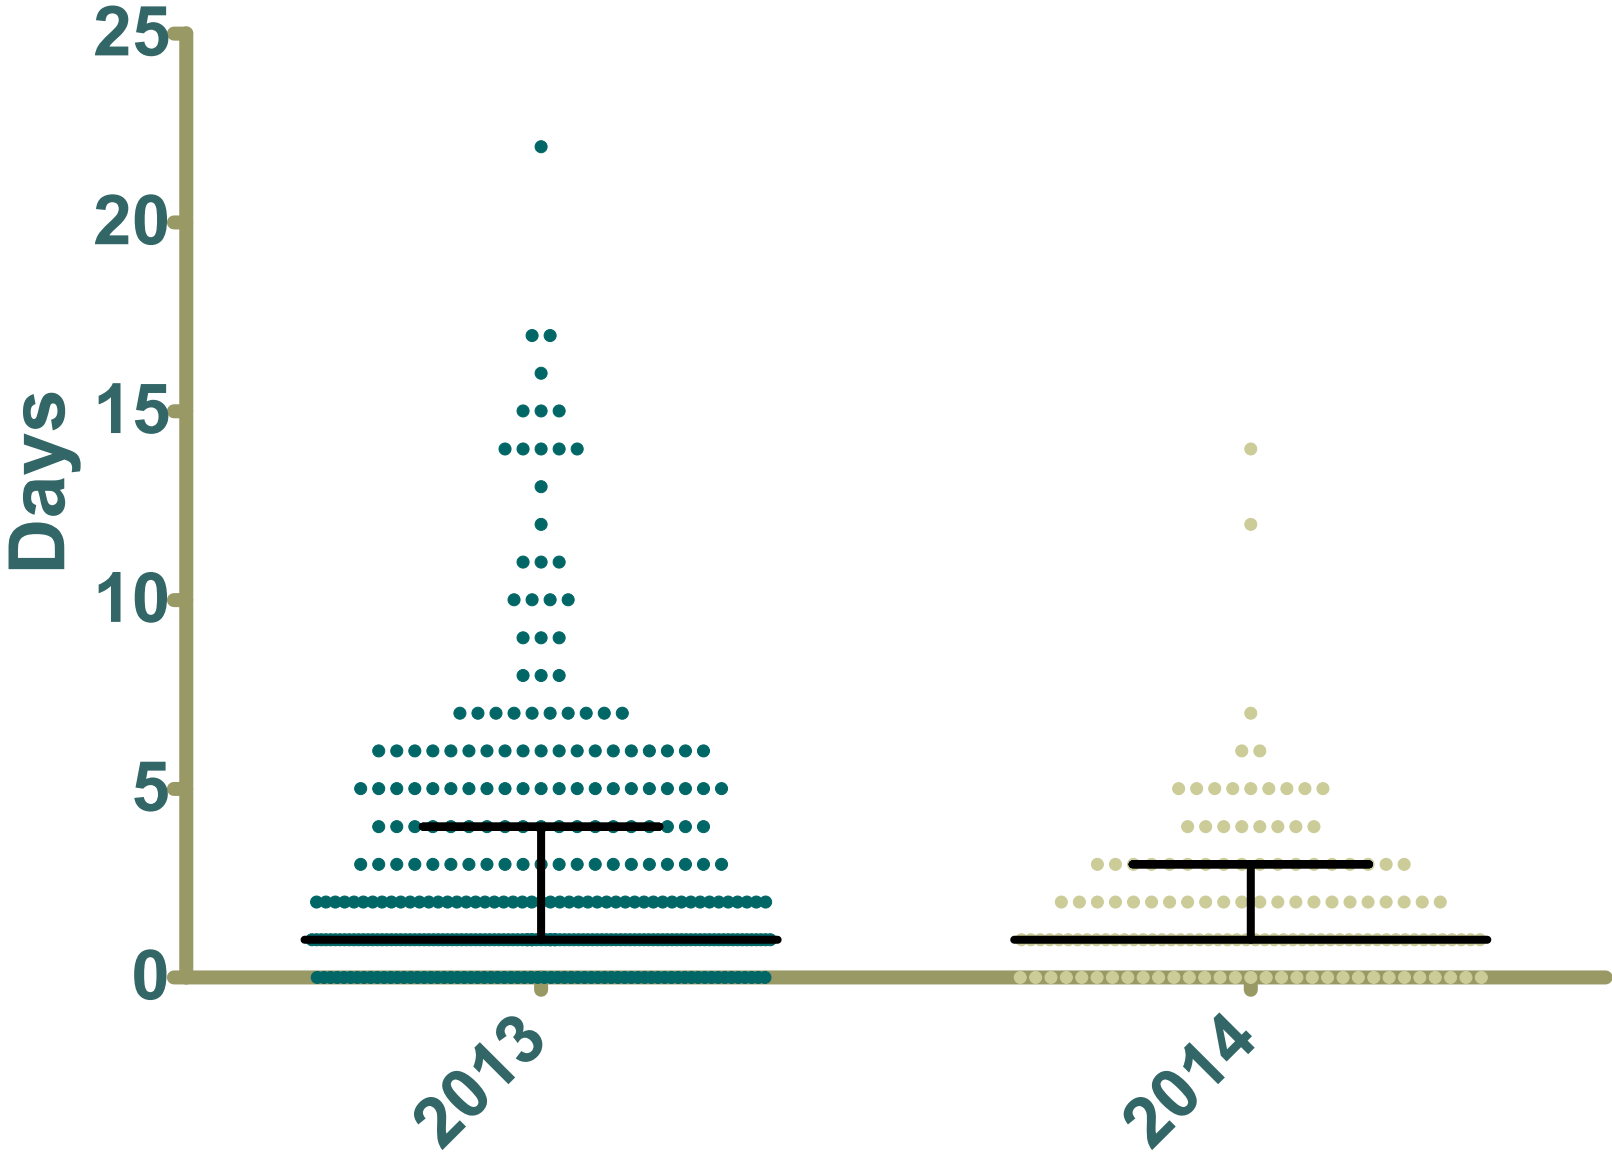

**FIGURE 5**
